# Supplementary material
Source: ML conference proceedings conference paper supplement (https://proceedings.neurips.cc/paper_files/paper/2012/hash/168908dd3227b8358eababa07fcaf091-Abstract.html)
Supplement: Supplementary file 1 [file 168908dd3227b8358eababa07fcaf091-Supplemental.zip]

Archive with 1 entries (1 files):
- PV_HarelMannor_Supplementary.pdf
